# Supplementary material for: Co-crystal engineering: a novel method to obtain one-dimensional (1D) carbon nanocrystals of corannulene–fullerene by a solution process
Source: Royal Society of Chemistry journal article supplement (doi:10.1039/c6nr05001h), 2016-01-01
Supplement: c6nr05001h1.pdf [file c6nr05001h1.pdf]

*Supporting Information for*

**Co-crystal Engineering: A Novel Method to Get One-dimensional (1D) Carbon  
Nanocrystal of Corannulene-fullerene by Solution Process**

Yu Wang,<sup>a</sup> Yang Li,<sup>b</sup> Weigang Zhu,<sup>b</sup> Jinyu Liu,<sup>b</sup> Xiaotao Zhang,<sup>\*a</sup> Rongjin Li,<sup>a</sup>  
Yonggang Zhen,<sup>b</sup> Huanli Dong<sup>b</sup> and Wenping Hu<sup>\*ab</sup>

**Contents**

- 1. Experimental section.**
- 2. Structure informations of CCCs shown by Mercury.**
- 3. XRD spectrum of cocrystals.**
- 4. UV spectrum and emission spectrum of corannulene, C<sub>60</sub> and mixed solution.**
- 5. Typical photoelectric properties of cocrystal nanowire devices.**
- 6. AFM image of a cocrystal nanowire.**
- 7. Energy levels of corannulene and C<sub>60</sub> calculated by DFT.**

## 1. Experimental section

Materials: corannulene( $C_{20}H_{10}$ , 98%) was provided by professor Jay. S. Siegel;  $C_{60}$  was purchased from Sigma-Aldrich Company and directly used without further purification. Toluene ( $C_7H_8$ , HPLC) was purchased from Beijing Chemical Co. China. Deionized water ( $18.2 \Omega M \text{ cm}^{-1}$ ) was made by a MilliQ (Millipore) water purification system.

Theoretical calculations: The molecular structure was firstly optimized based on the crystal structure got from the CCDC. The intermolecular potentials were calculated using UNI force field by Mercury software. And the glide planes are shown by Mercury software. Moreover, the calculations of the energy levels were using density functional theory (DFT) pw91.

Crystal Growth and Characterization: In a typical experiment, corannulene and  $C_{60}$  were mixed and dissolved in toluene with molar ratio 1:1. For preparation of cocrystals, the solution was directly dropped onto  $\text{SiO}_2/\text{Si}$  wafer and let it evaporate slowly in a weighing bottle. Transmission electron microscopy (TEM) and selected area electron diffraction (SAED) were performed on a JEOL JEM-1011 electron microscope at an acceleration of 100 kV to gain a sufficient transmission. For preparation of TEM samples, toluene solution was directly dropped onto TEM grids and the cocrystals were observed in several minutes. The crystal structures were analyzed in an X-ray diffractometer (XRD, X-Pert, PANalytic, Netherlands) with Cu K radiation (40 kV, 30 mA). Atomic force microscopy (AFM) analysis was conducted on a Veeco Nanoscope IV Multimode AFM (Veeco, USA). The UV absorption spectrums of the crystals were conducted on a Cary 5000 UV-VIS-NIR (varian, USA) and the PL/EX spectra were collected on Horiba FluoroMax-4-NIR spectrophotometers. IR spectra were collected on a Tensor-27 fourier infrared spectrometer (Bruker, Germany). Raman spectra were collected on an inVia-Reflex raman spectrometer (Renishaw, UK) excited with a 785nm laser. Electron spin resonance (ESR) spectrum was collected on Bruker E500-10/12 instrument with microwave frequency of 9.5 GHz. The fluorescence lifetimes were collected on lifespec lifetime measurement equipment (Edinburgh Instruments Ltd).

Device Fabrication and Measurement: The cocrystal nanowires were grown by directly dropping the mixed toluene solution onto the  $\text{BCB}/\text{SiO}_2/\text{Si}$  wafer. It has been reported that the capacitance of the substrates was  $10 \text{ nF}/\text{cm}^2$ . To reduce the influence of the solvent, cocrystals were heated at  $60 \text{ }^\circ\text{C}$  in vacuum for 2 h. Then gold (Au) electrodes (50 nm thick) were thermally evaporated onto cocrystals, using "organic ribbon mask method". All the devices measurements were recorded by a Keithley 4200 SCS analyzer and an iodine-tungsten lamp was used as a white light source. All measurements were performed at room temperature in air.

## 2. Structure informations of CCCs shown by Mercury.

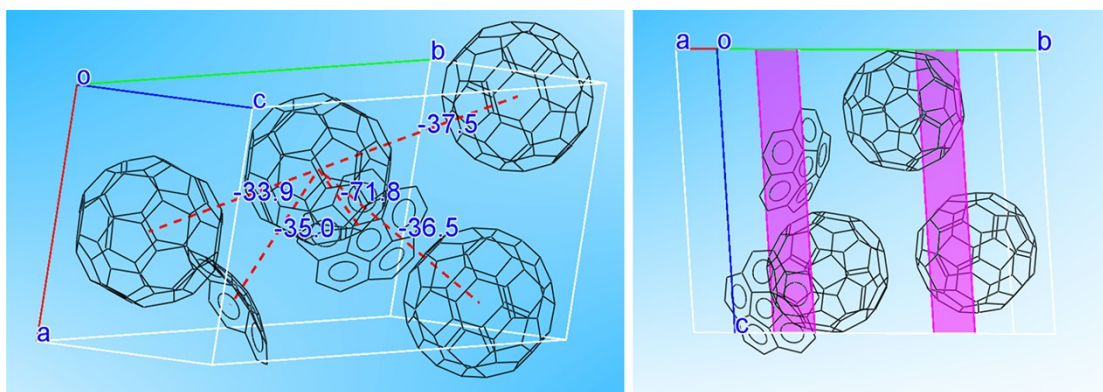

Figure S1. Five strongest interactions in cocrystal system (left) and glide planes of CCCs shown by Mercury (right).

### 3. XRD spectrum of cocrystals

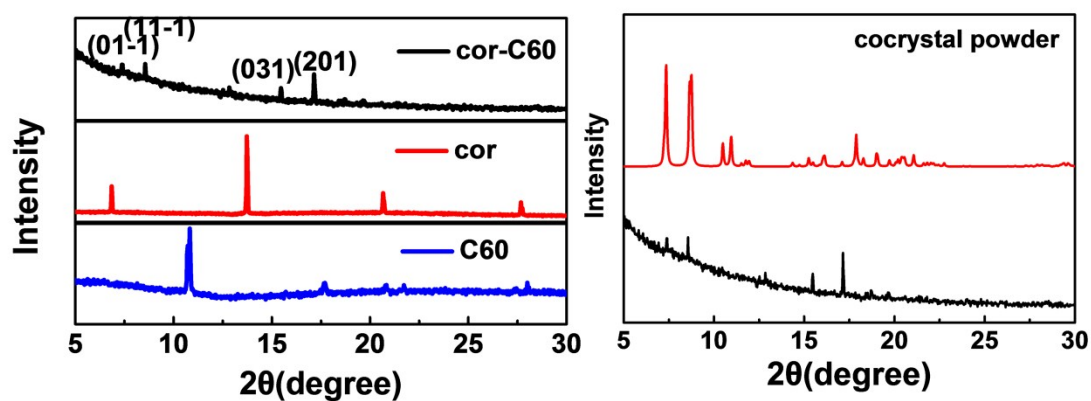

Figure S2. XRD spectrum of cocrystal nanowires.

### 4. UV spectrum and emission spectrum of corannulene, C<sub>60</sub> and mixed solution.

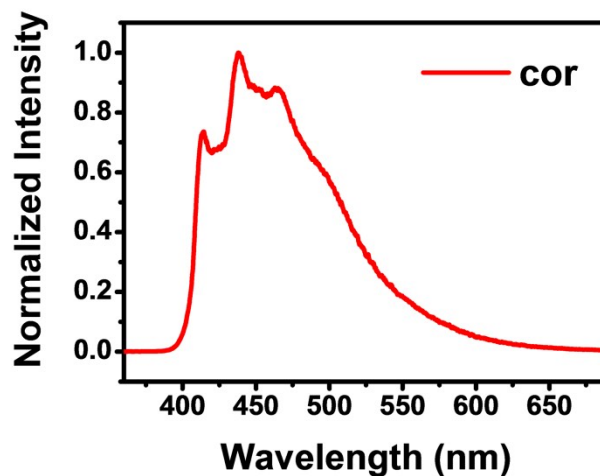

Figure S3. Emission spectrum of corannulene crystal.

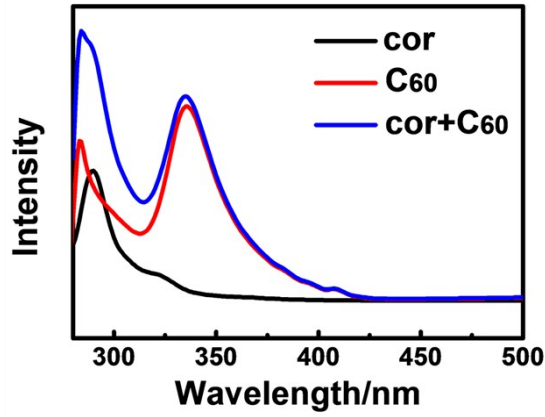

Figure S4. UV spectrum of corannulene, C<sub>60</sub> and their mixed solution in toluene.

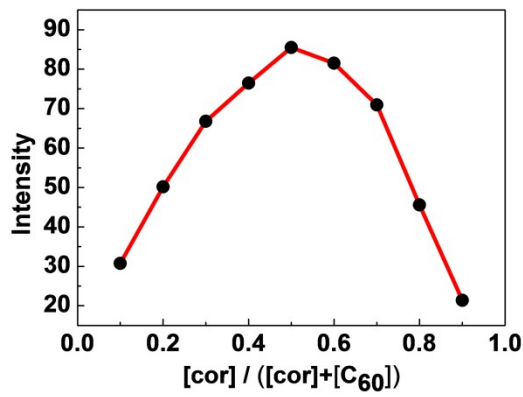

Figure S5. Job's plot of the corannulene and C<sub>60</sub> mixed solution in toluene (  $\lambda_{ex}$ =290nm,  $\lambda_{max}$ =427nm ).

## 5. Typical photoelectric properties of cocrystal nanowire devices.

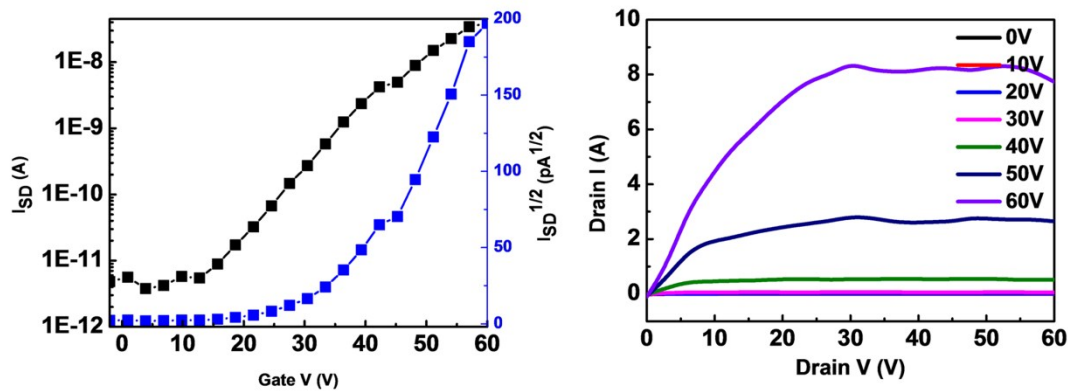

Figure S6. A typical cocrystal nanowire transfer characters (left) and its corresponding output curve (right). ( $V_{DS}$ =60V,  $W$ =0.80  $\mu\text{m}$ ,  $L$ =5.06  $\mu\text{m}$ ,  $\mu_e$ = 0.11  $\text{cm}^2\text{V}^{-1}\text{s}^{-1}$ )

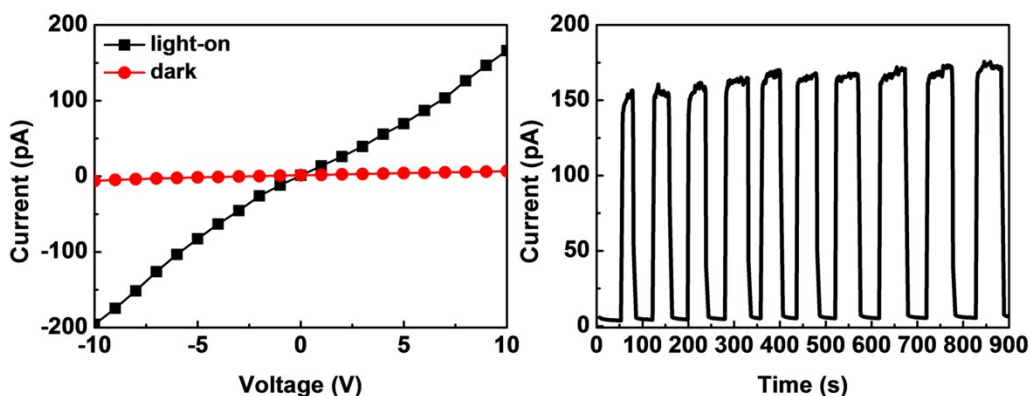

Figure S7. A typical cocystal nanowire current-voltage (I-V) curves (left) and its corresponding on/off switch curve (right). ( $I_{on}/I_{off}=33.96$ )

## 6. AFM image of a cocystal nanowire

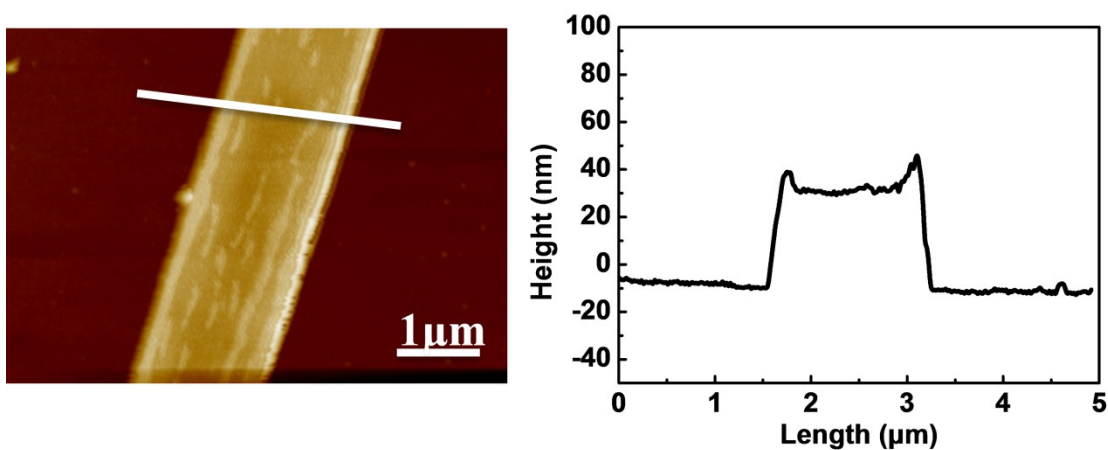

Figure S8. AFM analysis result of a cocystal nanowire. The height of the cocystal is around 52 nm.

## 7. Energy levels of corannulene and C<sub>60</sub> calculated by DFT

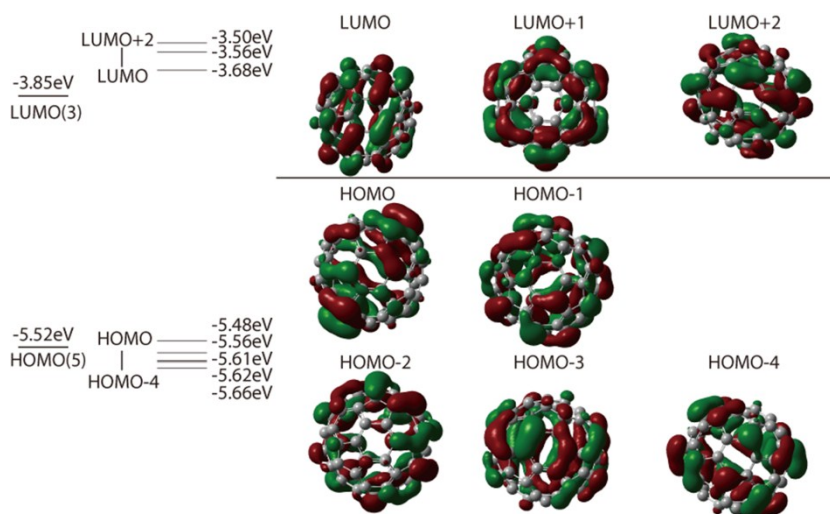

Figure S9. Energy levels of  $C_{60}$  before (left) and after (right) crystallization.

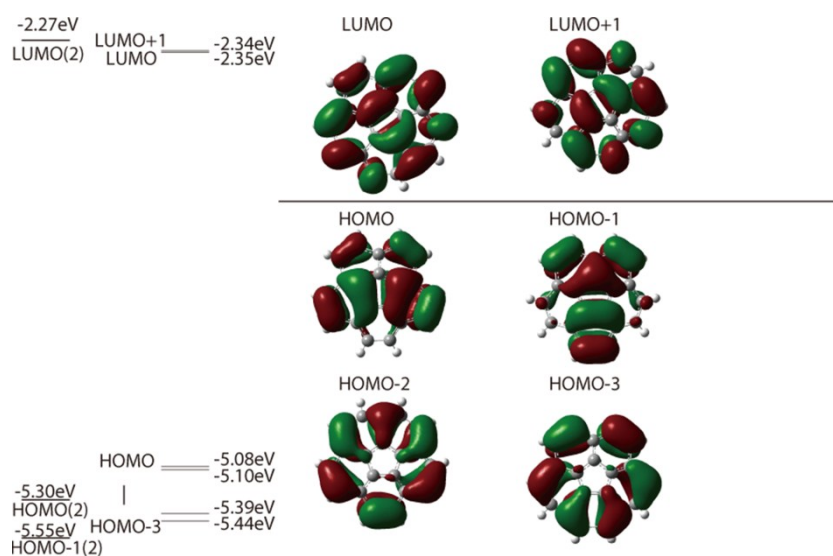

Figure S10. Energy levels of corannulene before (left) and after (right) crystallization.
